# Supplementary material for: Alkynyl-protected silver nanoclusters featuring an anticuboctahedral kernel
Source: Royal Society of Chemistry journal article supplement (doi:10.1039/c7nr02687k), 2017-01-01
Supplement: c7nr02687k1.pdf [file c7nr02687k1.pdf]

## Contents

### I. Physical measurements

### II. Synthesis

### III. Computational details

### IV. Supporting figures

#### I . Physical measurements

Shimadzu UV-2550 Spectrophotometer was used for the measurements. Spectra were typically measured in the range of 250-900 nm. NMR spectra were recorded on a Bruker Advance II spectrometer that operates at 500 MHz while recording  $^1\text{H}$ , 76.8 MHz for  $^2\text{H}$ , and 202 MHz for  $^{31}\text{P}$  NMR.  $^1\text{H}$  NMR spectra was referenced to TMS as an external standard, and  $^{31}\text{P}$  chemical shifts were referenced to external 85%  $\text{H}_3\text{PO}_4$ . Mass spectra were recorded on an Agilent Technologies ESI- TOF- MS. X-ray photoelectron spectroscopy (XPS) was recorded on PHI Quantum-2000. The sample was put under UHV to reach the  $10^{-8}$  Pa range. The nonmonochromatized Al  $\text{K}\alpha$  source was used at 10 kV and 10 mA. All binding energies were calibrated using the C (1s) carbon peak (284.6 eV), which was applied as an internal standard. High resolution narrow-scan spectra were recorded with the electron pass energy of 50 eV and takeoff angle of  $55^\circ$  to achieve the maximum spectral resolution.

**X-ray Crystallography.** Intensity data of **1** and **2** were collected on an Agilent SuperNova Dual system (Cu  $\text{K}\alpha$ ) at 100K. Absorption corrections were applied by using the program CrysAlis (multi-scan). The structure of **1** was solved by direct methods, and non-hydrogen atoms except  $\text{CH}_2\text{Cl}_2$  and toluene solvent molecules were refined anisotropically by least-squares on  $F^2$  using the SHELXTL program. Three phenyl groups (C13—C18; C143—C148; C221—C226) and the toluene solvent (C2S—C7S) were refined using a rigid model (AFIX 66). The largest residual density is near the position of Sb2 (0.92 Å). The structure of **2** was solved by direct methods, only all of Ag, P and Sb atoms were refined anisotropically by least-squares on  $F^2$  using the SHELXTL program. All initial refinements were severely restrained and constrained to idealized values (DFIX, AFIX and SADI). There is a level A alert “Large Reported Min. (Negative) Residual Density -14.77” in the crystal structure of **2**. The density minimum is near to atom Sb3 with a distance of 0.86 Å.

## II. Synthesis

### Materials and reagents.

Ethynylbenzene ( $\text{PhC}\equiv\text{CH}$ , 98%) bis(diphenylphosphino)methane (dppm, 98%), 1,5-bis(diphenylphosphino) pentane (dpppe, 98%) and Silver hexafluoroantimonate ( $\text{AgSbF}_6$ , 98.0%) were purchased from J&K; sodium borohydride ( $\text{NaBH}_4$ , 98%) and other reagents employed were purchased from Sinopharm Chemical Reagent Co. Ltd. (Shanghai, China).  $\text{PhC}\equiv\text{C}\text{Ag}$  was prepared by reacting of  $\text{Ag}_2\text{O}$  and  $\text{PhC}\equiv\text{CH}$  in the presence of ammonium hydroxide. All reagents were used as received.

### $[\text{Ag}_{19}(\text{PhC}\equiv\text{C})_{14}(\text{dppm})_3](\text{SbF}_6)_3$

1 mL 0.1 M  $\text{AgSbF}_6$  (0.1 mmol) in ethanol was added to the mixture of  $\text{PhC}\equiv\text{C}\text{Ag}$  (42 mg, 0.2 mmol) and Bis(diphenylphosphino)methane (38.4 mg, 0.1 mmol) in 3 mL ethanol. After ultrasonication, the pale yellow suspension was stirred for 30 min. 1 ml 0.040 M freshly prepared ethanol solution of  $\text{NaBH}_4$  (0.04 mmol) was added dropwise under vigorous stirring, the color changed to brown in 5 min. The reaction mixture was stirred at room temperature in the absence of light for 9 h in air. The resulted mixture was centrifuged for 3 min at 10000 r/min and washed twice with ethanol. This crude brown solid was dissolved in a mixture of 3 mL  $\text{CH}_2\text{Cl}_2$  and 0.2 mL toluene. After filtration, the filtrate was subject to the diffusion of a mixture of ether and n-hexane ( $v : v = 1 : 1$ ) at  $4^\circ\text{C}$  to afford purple blue crystals after 5 days (37.5 mg, yield 46% based on Ag).

Anal. UV-Vis ( $\lambda$ , nm): 441; 590;  $E_g = 1.97$  eV. ESI-TOF-MS ( $\text{CH}_2\text{Cl}_2$ ): 1539.38 ( $[\text{Ag}_{19}(\text{dppm})_3(\text{PhC}\equiv\text{C})_{14}]^{3+}$ ) and 2427.50 ( $[\text{Ag}_{19}(\text{dppm})_3(\text{PhC}\equiv\text{C})_{14}(\text{SbF}_6)]^{2+}$ ).  $^1\text{H}$  NMR (500MHz,  $\text{CD}_2\text{Cl}_2$ ,  $\delta$ , ppm): 3.49 (t,  $^2J_{\text{PH}} = 10.0$  Hz, 6H,  $\text{CH}_2$ ), 6.22-7.65 (m, 130H, Ph).  $^{31}\text{P}$  NMR (202 MHz,  $\text{CD}_2\text{Cl}_2$ ,  $\delta$ , ppm): 5.41 [ $J(^{109}\text{Ag-P}) = 760$ ,  $J(^{107}\text{Ag-P}) = 657$ ,  $^3J(^{109}\text{Ag-P}) = -3.6$ ,  $^3J(^{107}\text{Ag-P}) = -1.2$ ,  $^2J(\text{P-P}) = 178$  Hz]. XPS (binding energy, eV): Ag  $3d_{5/2}$ , 368.0; Ag  $3d_{3/2}$ , 374.0 eV.

### $\text{Ag}_{25}(\text{MeO-PhC}\equiv\text{C})_{20}(\text{dpppe})_3(\text{SbF}_6)_3$

1 mL 0.1 M  $\text{AgSbF}_6$  (0.1 mmol) in ethanol was added to the mixture of  $\text{MeO-PhC}\equiv\text{C}\text{Ag}$  (44 mg, 0.2 mmol) and 1,5-bis(diphenylphosphino) pentane (44 mg, 0.1 mmol) in 3 mL ethanol. After ultrasonication, the pale yellow suspension was stirred for 30 min. 1 ml 0.040 M freshly prepared ethanol solution of  $\text{NaBH}_4$  (0.04

mmol) was added dropwise under vigorous stirring, the color changed to brown in 10 min. The reaction mixture was stirred at room temperature in the absence of light for 9 h in air. The resulted mixture was centrifuged for 3 min at 10000 r/min and washed twice with ethanol. This crude brown solid was dissolved in a mixture of 3 mL CH<sub>2</sub>Cl<sub>2</sub> and 0.2 mL toluene. After filtration, the filtrate was subject to the diffusion of a mixture of ether and n-hexane (v : v = 1 : 1) at 4°C to afford purple blue crystals after 5 days (31 mg, yield 35% based on Ag).

Anal. UV-vis ( $\lambda$ , nm): 410; 450; 590 nm. Eg = 1.97 eV. ESI-MS (CH<sub>2</sub>Cl<sub>2</sub>/MeOH = 5 : 1 (V : V): 2213.68 ([Ag<sub>25</sub>dpppe<sub>3</sub>(MeO-PhC≡C)<sub>20</sub>]<sup>3+</sup>) and 3438.48 ([Ag<sub>25</sub>dpppe<sub>3</sub>(MeO-PhC≡C)<sub>20</sub>(SbF<sub>6</sub>)<sub>2</sub>]<sup>2+</sup>). <sup>31</sup>P NMR (202 MHz, CD<sub>2</sub>Cl<sub>2</sub>,  $\delta$ , ppm): 4.0 ppm (external reference 85% H<sub>3</sub>PO<sub>4</sub>). XPS (binding energy, eV): Ag 3d<sub>5/2</sub>, 368.3; Ag 3d<sub>3/2</sub>, 374.4 eV.

### III. Computational details

Density functional theory (DFT) calculations of the Ag<sub>19</sub> cluster were performed with the quantum chemistry program Turbomole V6.5.<sup>[1]</sup> Since the phenyl rings did not contribute to the frontier molecular orbitals of the cluster, we replaced Ph- rings in PhCC- and (Ph<sub>2</sub>P)<sub>2</sub>CH<sub>2</sub> ligands with –CH<sub>3</sub> groups for computational efficiency. The def2-SV(P) basis sets were used for C, P, S and H, while effective core potentials which have 19 valence electrons and include scalar relativistic corrections were used for Ag.<sup>[2]</sup> Geometry optimization was done with the TPSS (Tao, Perdew, Staroverov, and Scuseria) functional.<sup>[3]</sup> Time-dependent DFTs were done at the hybrid B3-LYP level with def2-SV(P) basis sets. All transitions together with their oscillator strengths were then convoluted with a Lorentzian line shape of 0.15 eV broadening to make the optical-absorption spectrum.

- [1] R. Ahlrichs, M. Bar, M. Haser, H. Horn, C. Kolmel, *Chem. Phys. Lett.* **1989**, *162*, 165-169.
- [2] D. Andrae, U. Häußermann, M. Dolg, H. Stoll, H. Preuß, *Theor. Chim. Acta* **1990**, *77*, 123-141.
- [3] J. Tao, J. P. Perdew, V. N. Staroverov, G. E. Scuseria, *Phys. Rev. Lett.* **2003**, *91*, 146401.

## IV. Supporting figures

ysf506b 20140602  
CD<sub>2</sub>Cl<sub>2</sub>

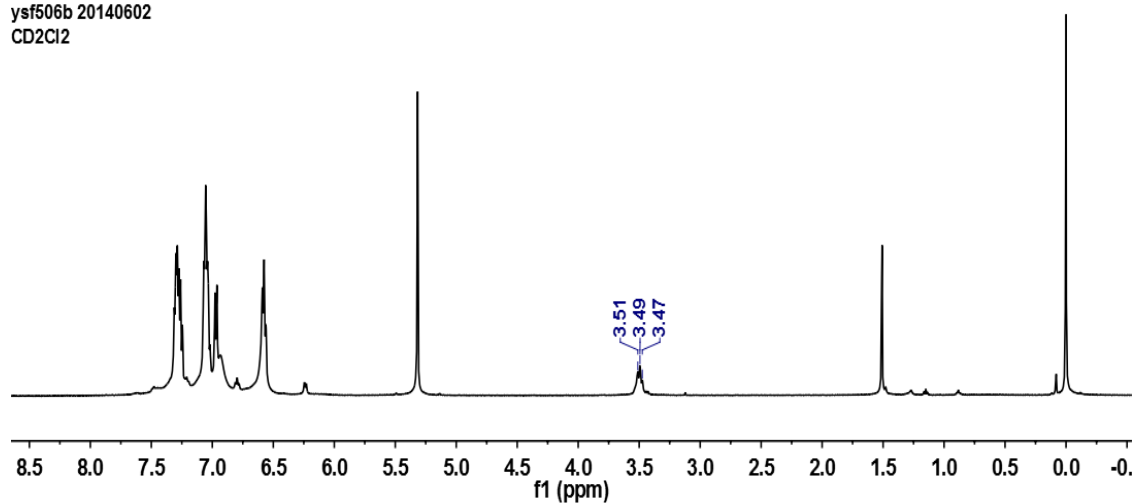

**Figure S1.** <sup>1</sup>H NMR spectrum of **1** in CD<sub>2</sub>Cl<sub>2</sub>

YSF596B6 20140821 D  
CD<sub>2</sub>Cl<sub>2</sub>

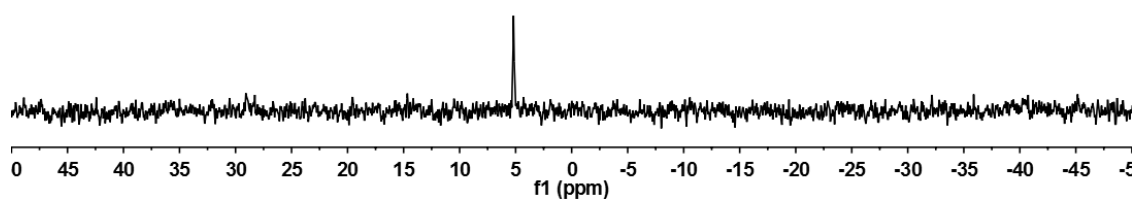

**Figure S2.** <sup>2</sup>H NMR (CH<sub>2</sub>Cl<sub>2</sub>/CD<sub>2</sub>Cl<sub>2</sub>, v : v = 500 : 1) spectrum of **1** synthesized by using NaBD<sub>4</sub> in place of NaBH<sub>4</sub>. The peak at 5.32 ppm is from CD<sub>2</sub>Cl<sub>2</sub>.

## AA'XX' patterns:

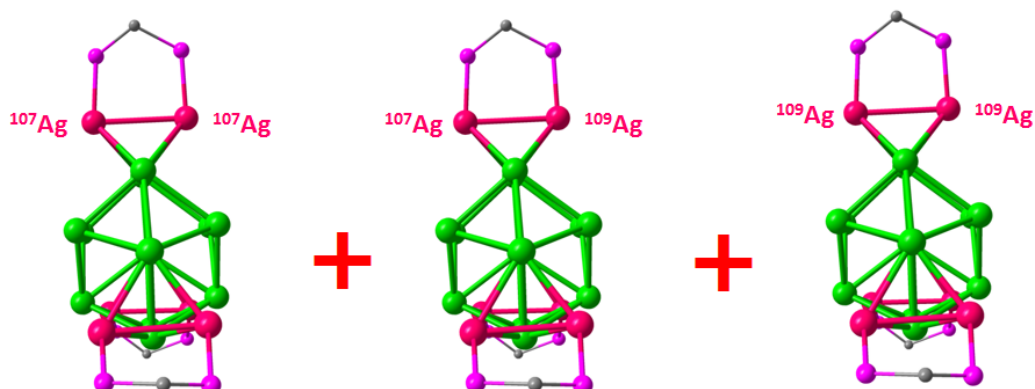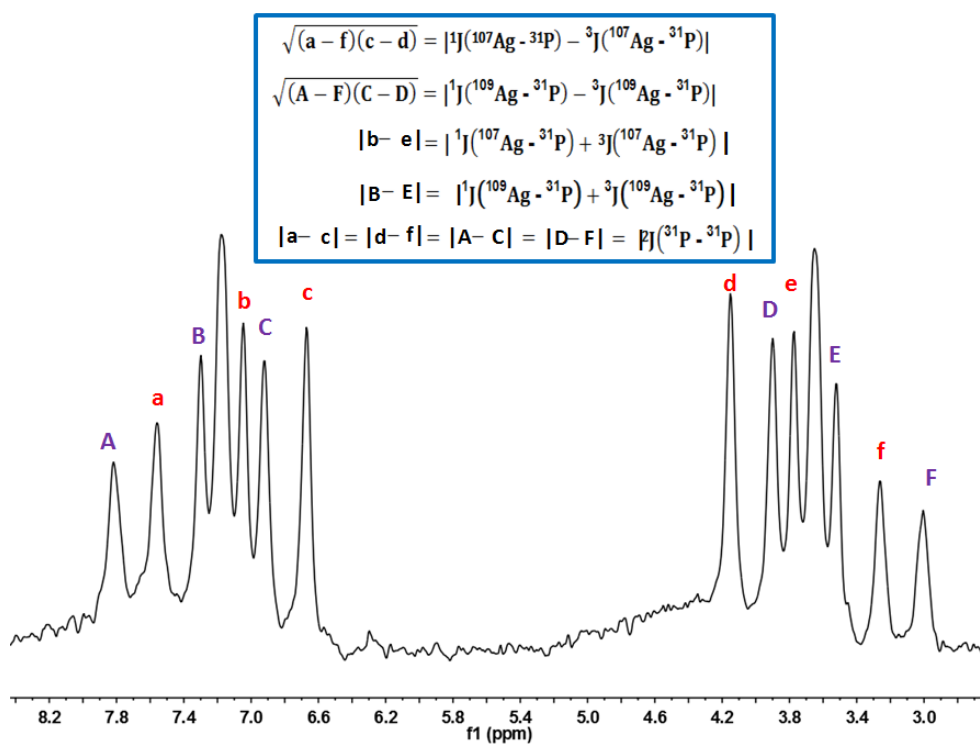

| $\delta$ | $^1J(^{107}\text{Ag}-^{31}\text{P})$ | $^3J(^{107}\text{Ag}-^{31}\text{P})$ | $^1J(^{109}\text{Ag}-^{31}\text{P})$ | $^3J(^{109}\text{Ag}-^{31}\text{P})$ | $^2J(^{31}\text{P}-^{31}\text{P})$ |
|----------|--------------------------------------|--------------------------------------|--------------------------------------|--------------------------------------|------------------------------------|
| 5.41ppm  | 657Hz                                | -1.2Hz                               | 760Hz                                | -3.6Hz                               | 178Hz                              |

**Figure S3.**  $^{31}\text{P}$  NMR spectrum of **1** in  $\text{CD}_2\text{Cl}_2$  and the analysis of coupling constants.

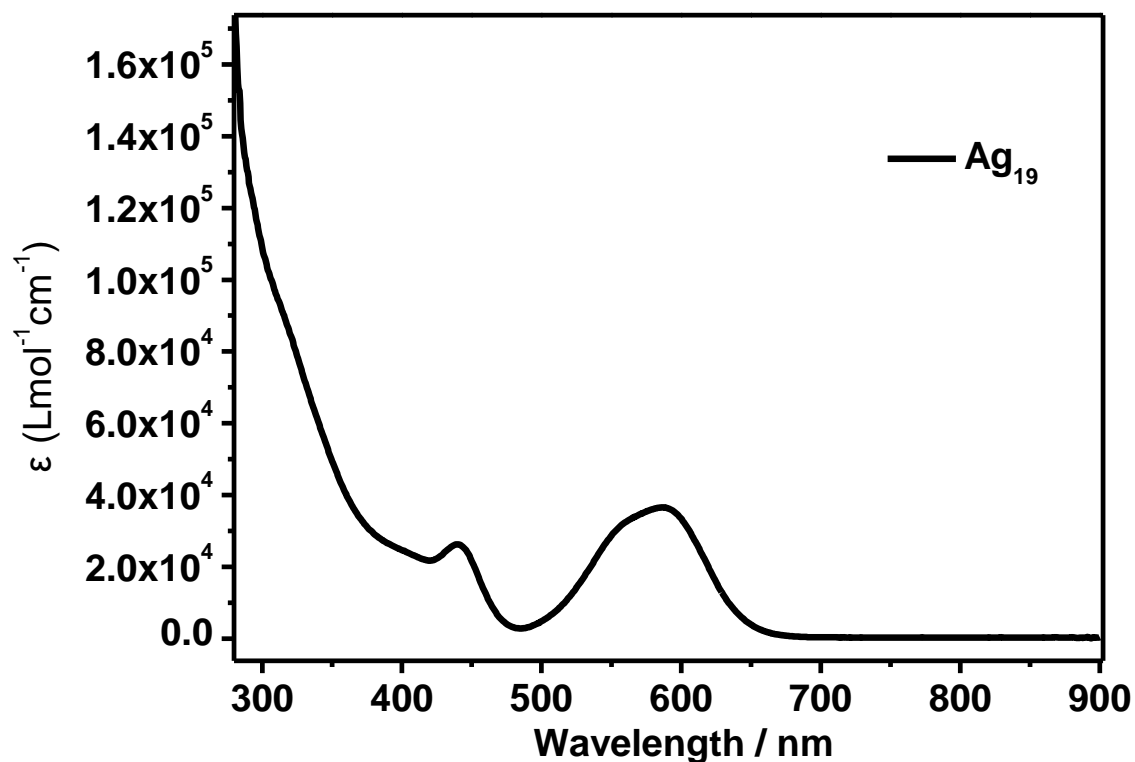

**Figure S4.** UV-Vis spectrum of  $[\text{Ag}_{19}(\text{dppm})_3(\text{PhC}\equiv\text{C})_{14}](\text{SbF}_6)_3$  in  $\text{CH}_2\text{Cl}_2$ . For the experimental spectrum shown in Figure 5 of the main text, a Jacobian factor was applied to convert the nm-based to eV-based absorbance.

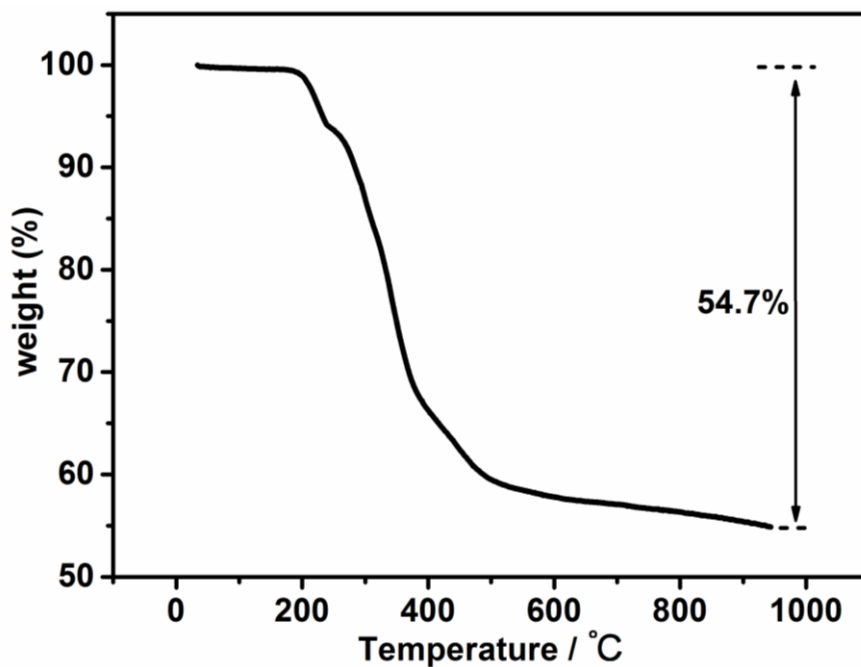

**Figure S5.** Thermogravimetric analysis (TGA) of **1** in  $\text{N}_2$  atmosphere.

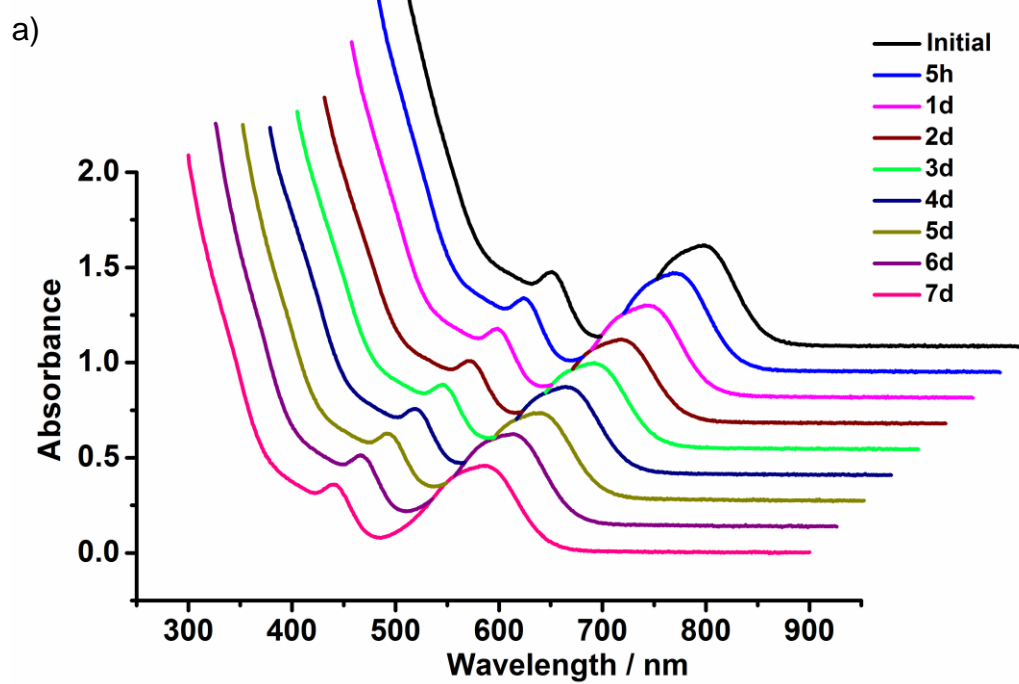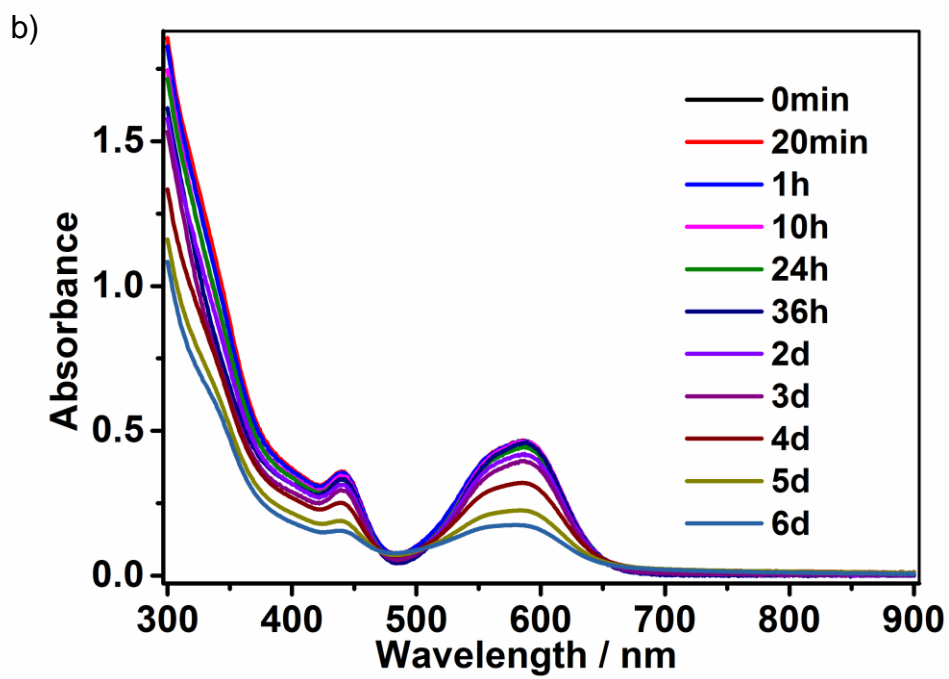

c)

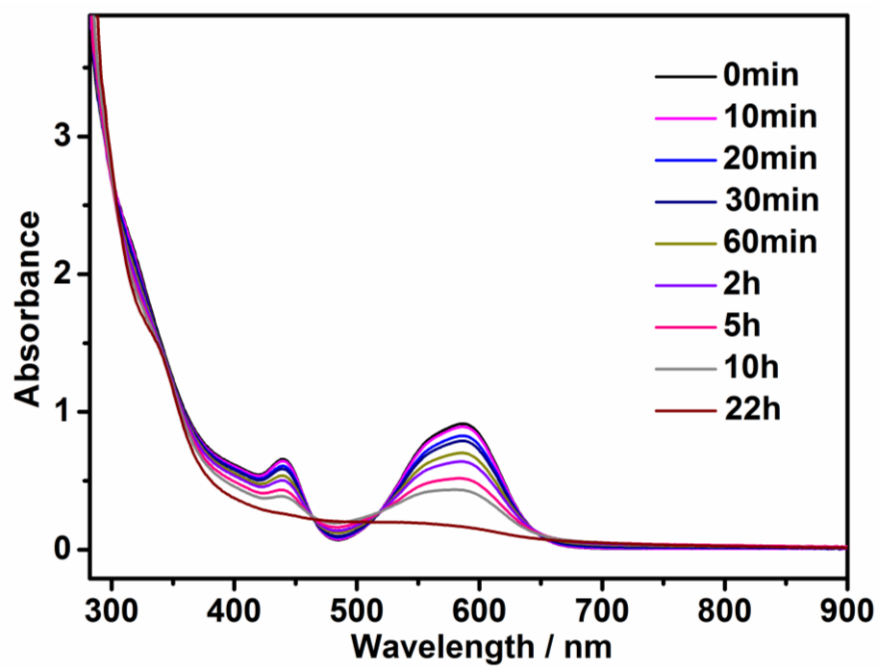

d)

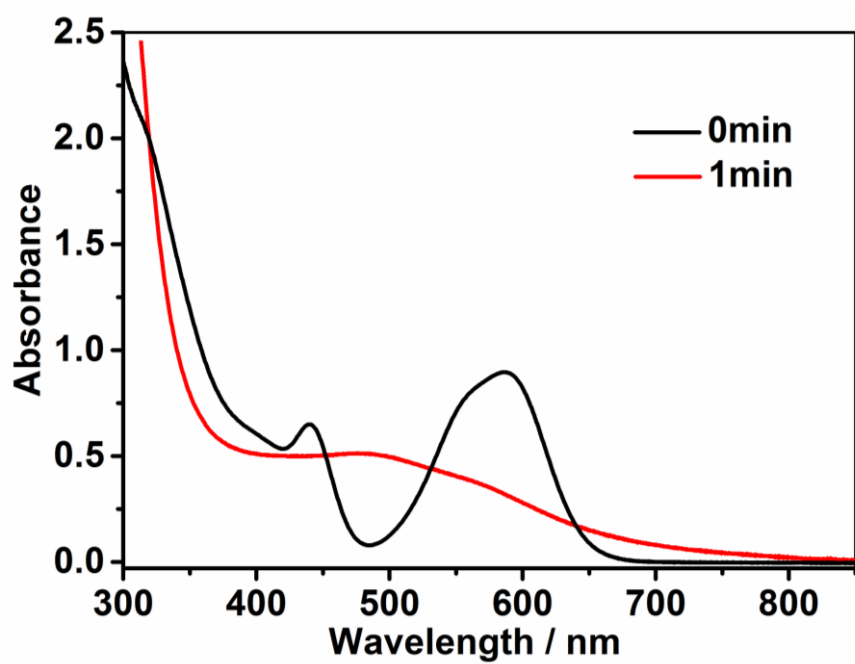



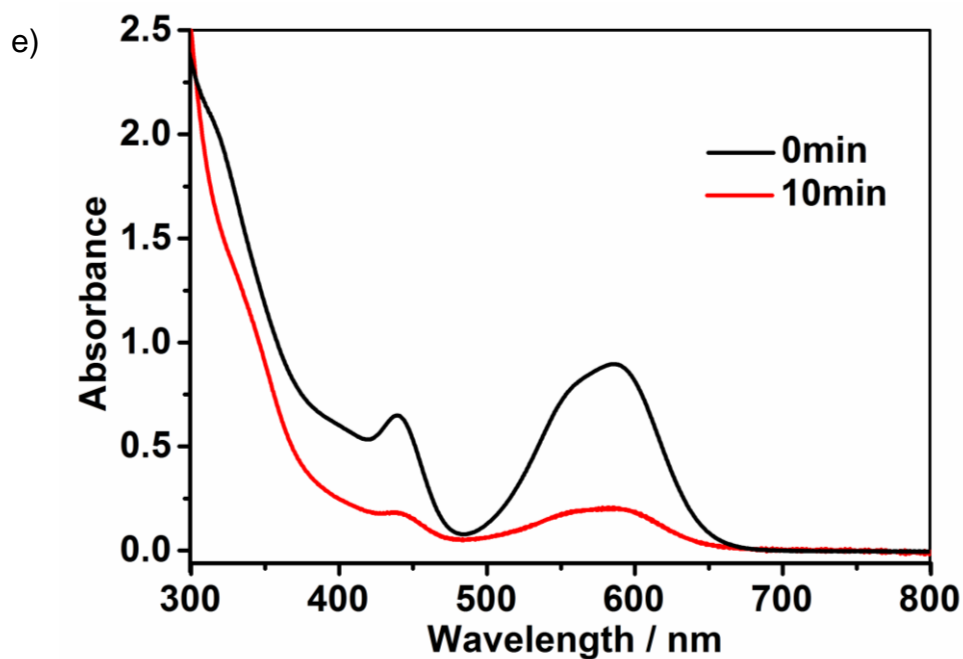

**Figure S6.** Time-dependent UV-Vis spectra of **1** for monitoring stability under various conditions. a) in  $N_2$  atmosphere at room temperature in  $CH_2Cl_2$ ; b) under ambient conditions in  $CH_2Cl_2$ ; c) alkaline environment:  $Ag_{19}$  (2 mg) was dissolved in 2 mL  $CH_2Cl_2$  and mixed with 20  $\mu L$  0.2 M MeONa in MeOH; d) acidic environment:  $Ag_{19}$  (2 mg) was dissolved in 2 mL  $CH_2Cl_2$  and mixed with 2  $\mu L$   $CH_3COOH$ ; e) high temperature environment:  $Ag_{19}$  (2 mg) was dissolved in 1 mL  $CH_2Cl_2$  and 3 mL toluene at 80  $^{\circ}C$ .

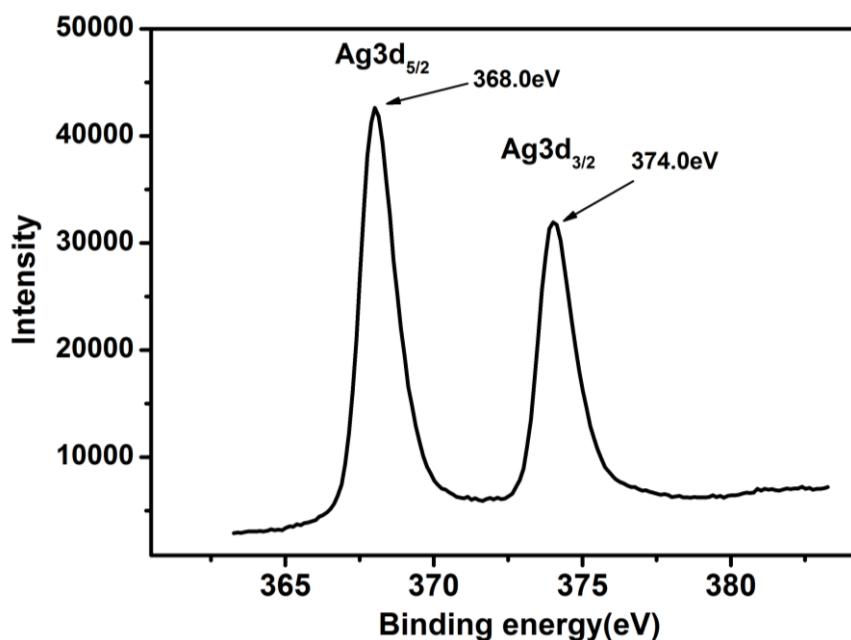

**Figure S7.** XPS spectrum of **1**.

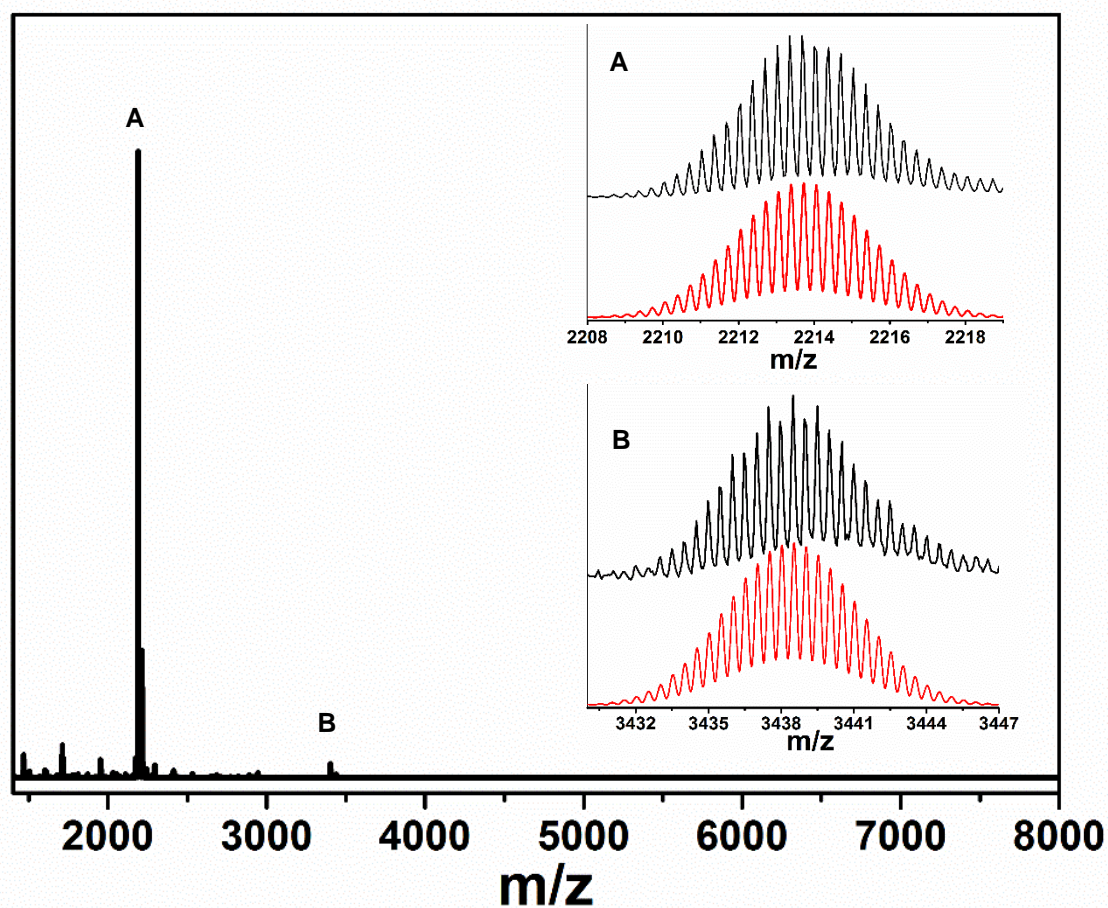

**Figure S8.** Mass spectra of  $[Ag_{25}(dpppe)_3(PhC\equiv C)_{20}](SbF_6)_3$  (**2**). Inset: the experimental (black trace) and simulated (red trace) isotopic patterns of molecular ion.

20150530 ysf742a  
Acetone

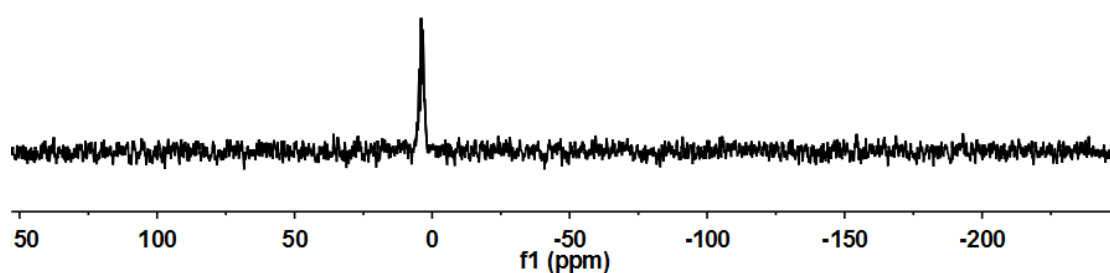

**Figure S9.**  $^{31}P$  NMR spectrum of **2** in  $acetone-D_6$ .

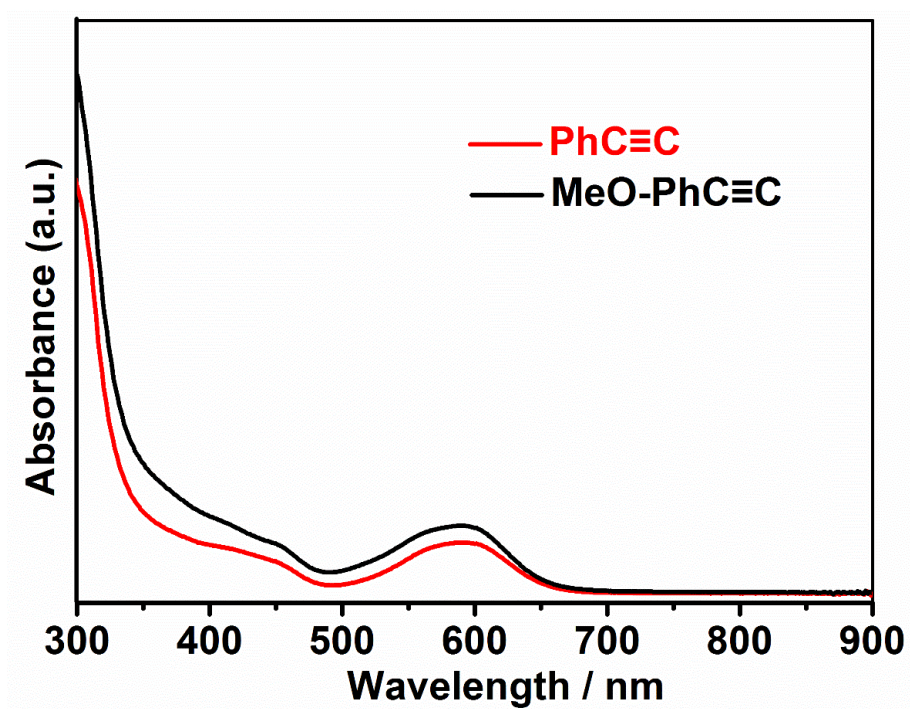

**Figure S10.** UV-vis spectra of  $\text{Ag}_{25}$  in  $\text{CH}_2\text{Cl}_2$  protected by different alkynyl groups.

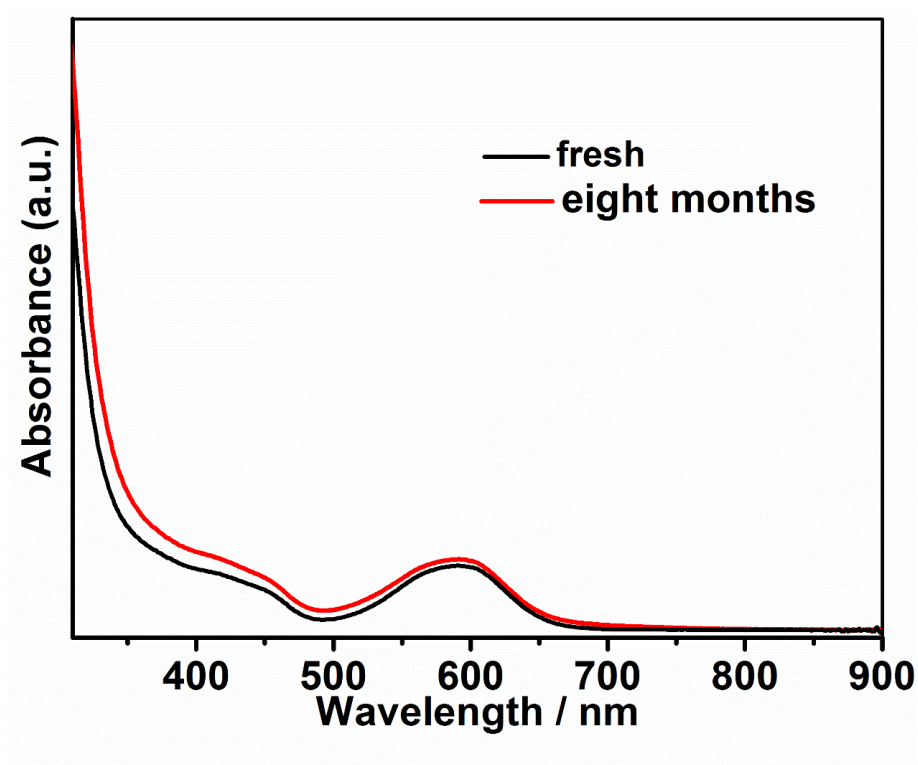

**Figure S11.** UV-vis spectra of **2** in  $\text{CH}_2\text{Cl}_2$  measured at different time for stability check (solid stored for eight months).

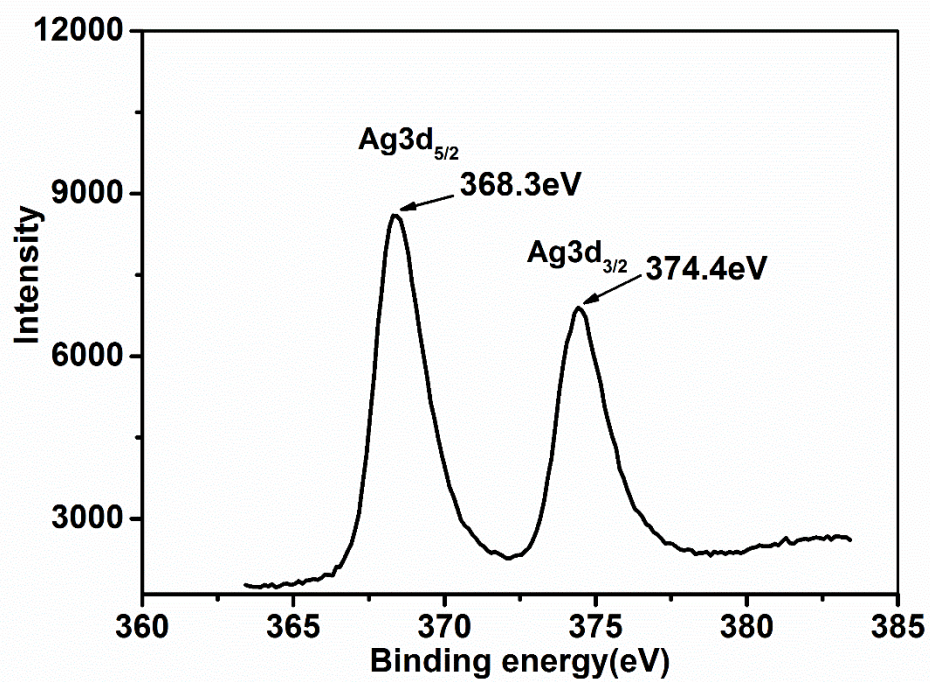

Figure S12. XPS spectrum of 2.

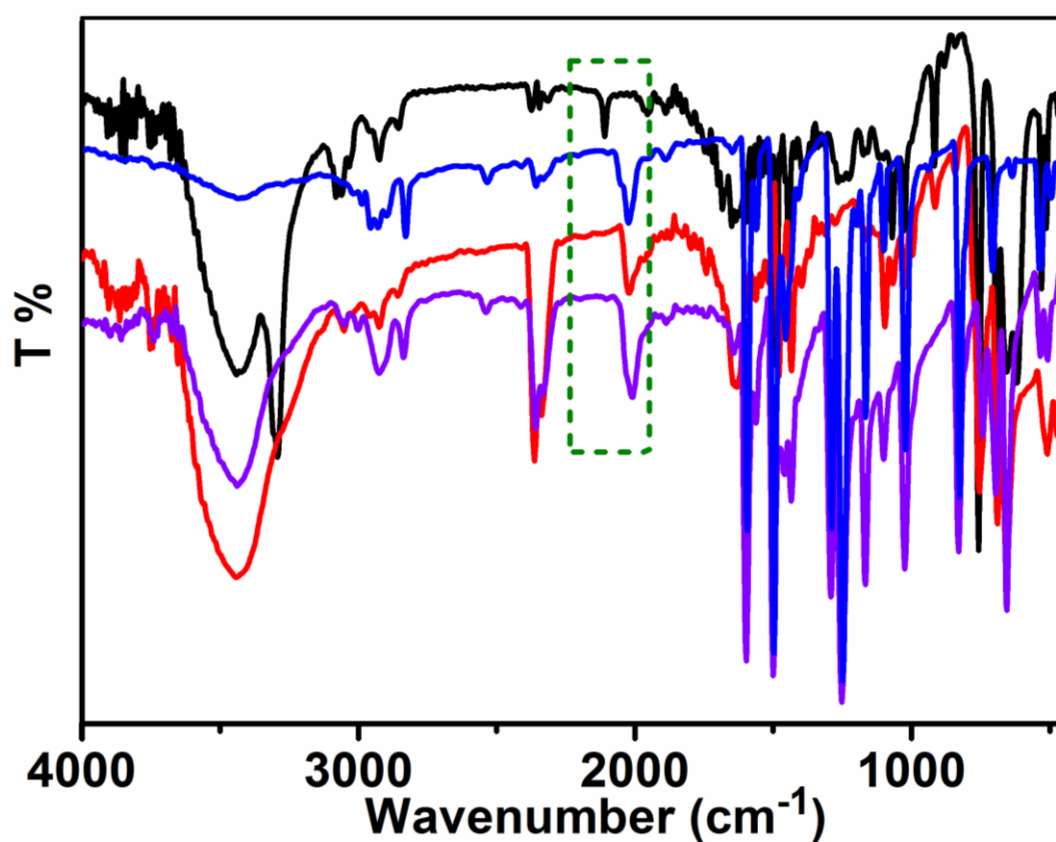

Figure S13. IR spectrum of PhC≡CH (black trace), MeOPhC≡CAg (blue trace), Ag<sub>19</sub> (red trace) and Ag<sub>25</sub> (purple trace).
